# Supplementary material
Source: PubMed Central journal article supplement (PMC1187964)
Supplement: pnas_0502078102_6.pdf [file pnas_0502078102_6.pdf]

Scheme 1.<sup>a</sup>

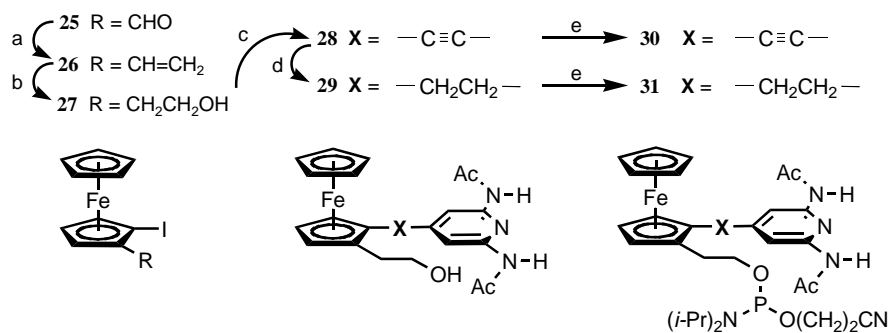

<sup>a</sup>Key: (a)  $\text{Ph}_3\text{PCH}_3\text{Br}$ ,  $t\text{-BuOK}$ , THF; (b) (i) 9-BBN, THF; (ii) 2*N* NaOH, EtOH; (iii) 30%  $\text{H}_2\text{O}_2$ ; (c) 2,6-diacetamido-4-ethynylpyridine,  $(\text{Ph}_3\text{P})_4\text{Pd}$ ,  $\text{Cu}(\text{OAc})_2 \cdot \text{H}_2\text{O}$ ,  $i\text{-Pr}_2\text{NH}$ , DMF; (d)  $\text{PtO}_2$ ,  $\text{H}_2$  (50 atm), EtOH; (e)  $\text{NC}(\text{CH}_2)_2\text{OPClN}(\text{Pr-}i)_2$ , 4-(dimethylamino)pyridine,  $i\text{-Pr}_2\text{NEt}$ ,  $\text{CH}_2\text{Cl}_2$ .
