# Supplementary material
Source: PubMed Central journal article supplement (PMC1187964)

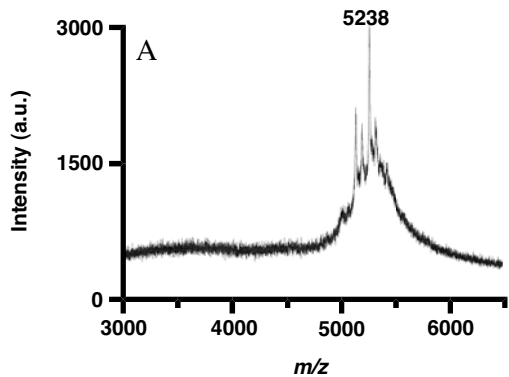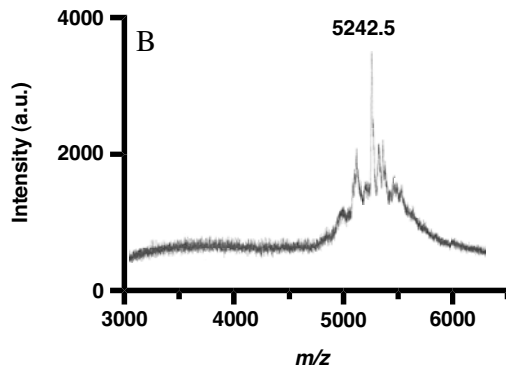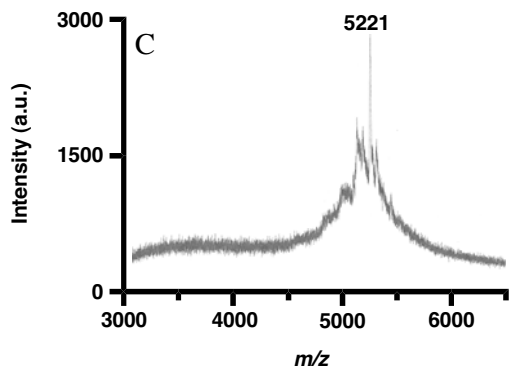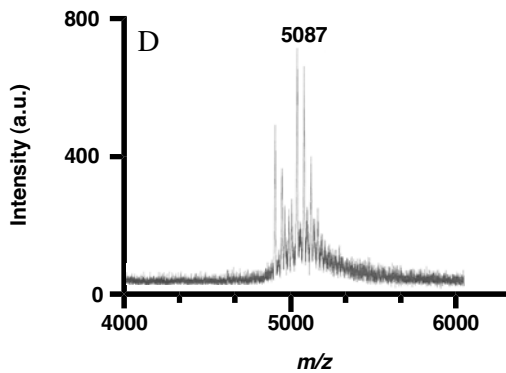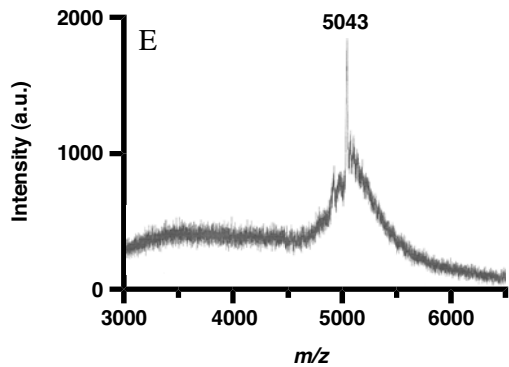

Supplement: pnas_0502078102_1.pdf [file pnas_0502078102_1.pdf]

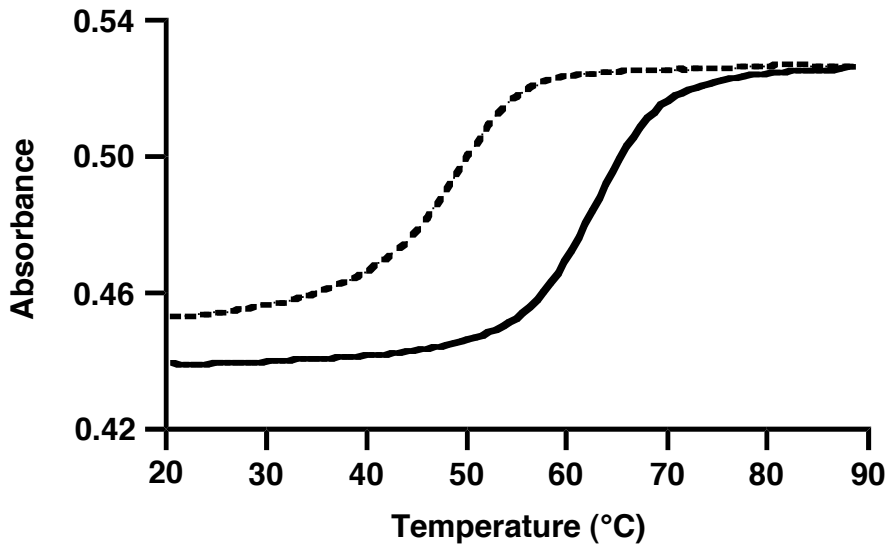

Supplement: pnas_0502078102_2.pdf [file pnas_0502078102_2.pdf]

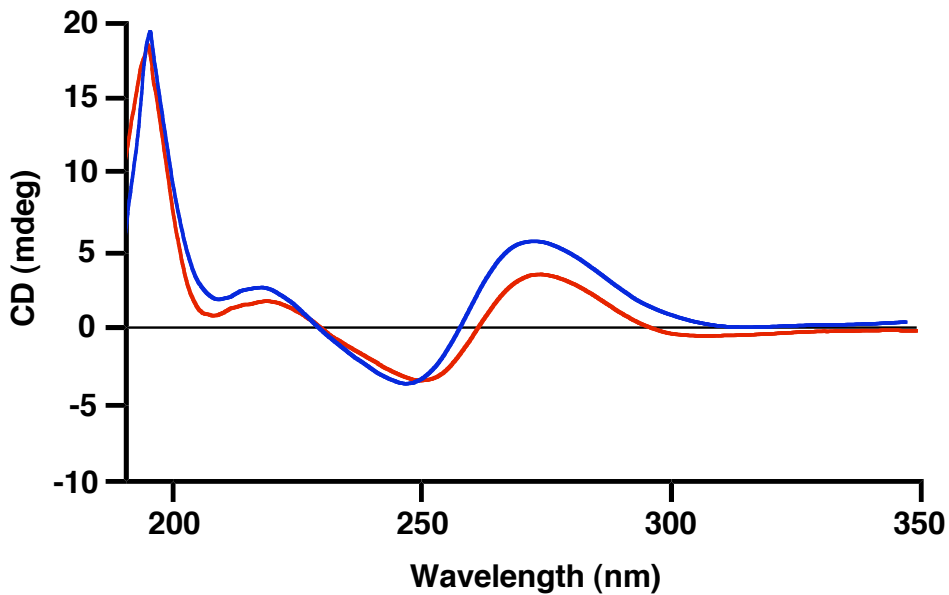

Supplement: pnas_0502078102_3.pdf [file pnas_0502078102_3.pdf]

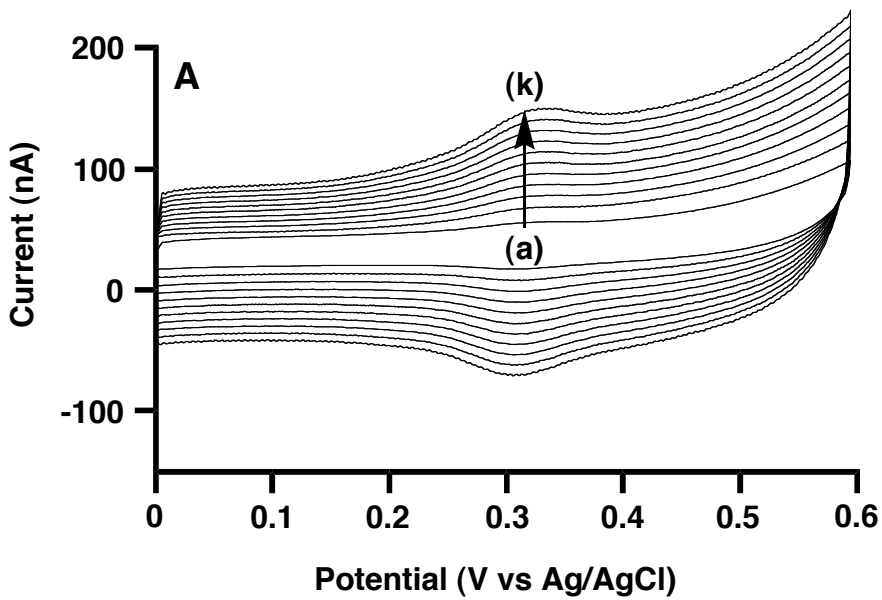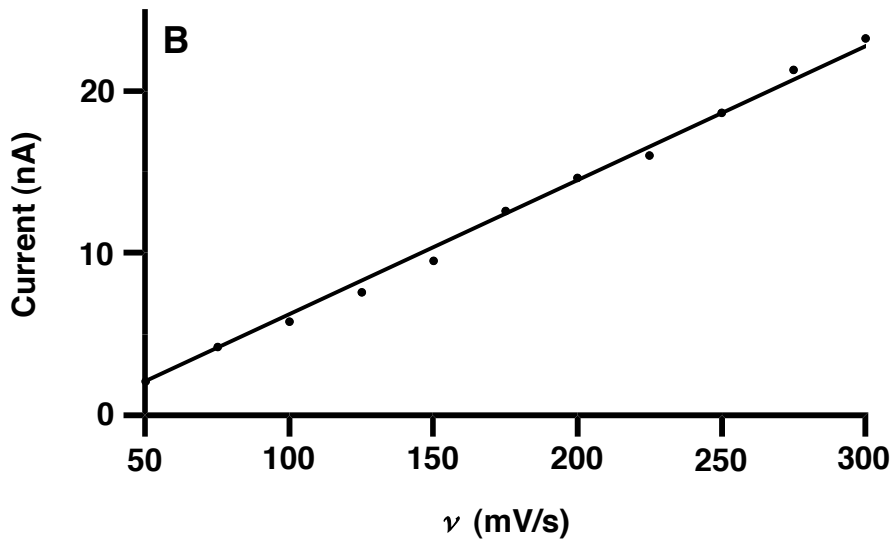

Supplement: pnas_0502078102_4.pdf [file pnas_0502078102_4.pdf]

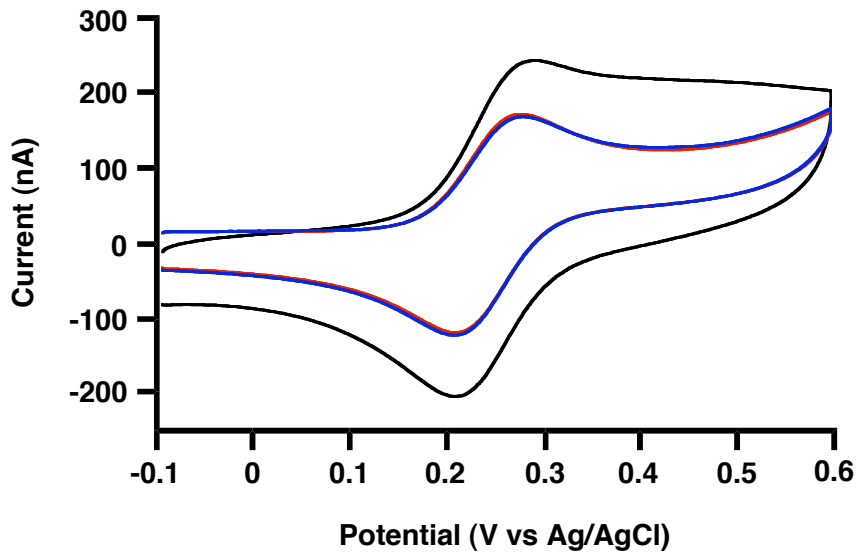

Supplement: pnas_0502078102_5.pdf [file pnas_0502078102_5.pdf]
